# Supplementary material for: Long noncoding RNA PM maintains cerebellar synaptic integrity and Cbln1 activation via Pax6/Mll1-mediated H3K4me3
Source: PubMed Central journal article supplement (PMC8219131; doi:10.1371/journal.pbio.3001297), 2021-06-10

**Figure 6B**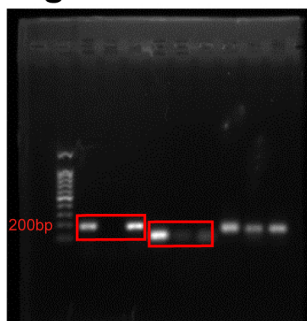**Figure S2A**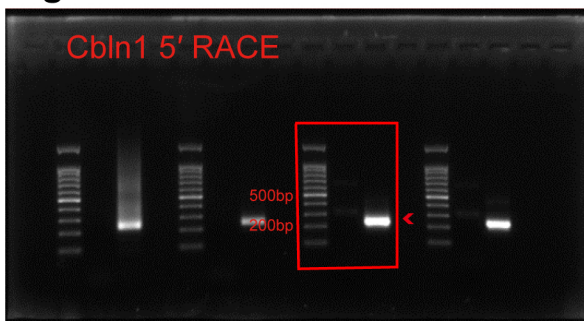**Figure S2C**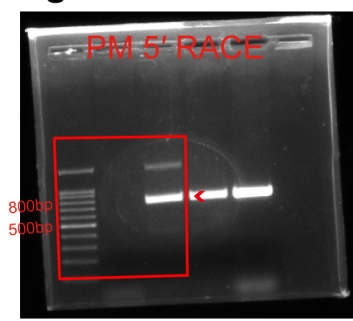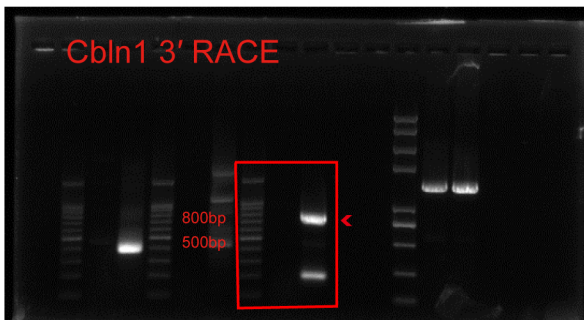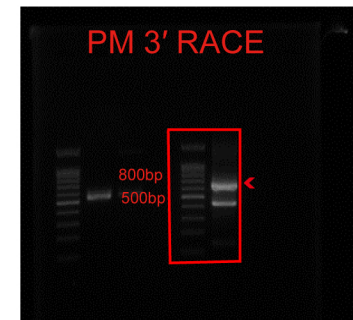**Figure S7A**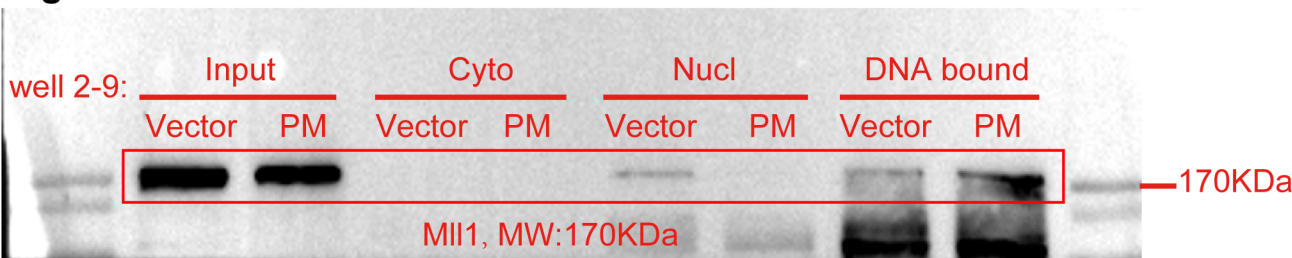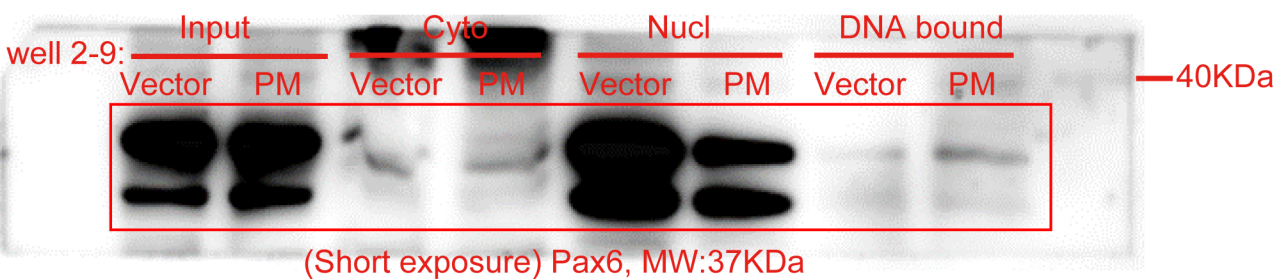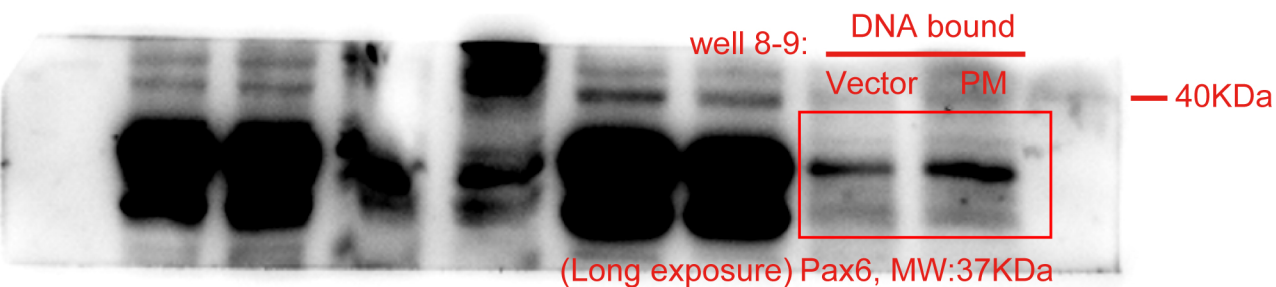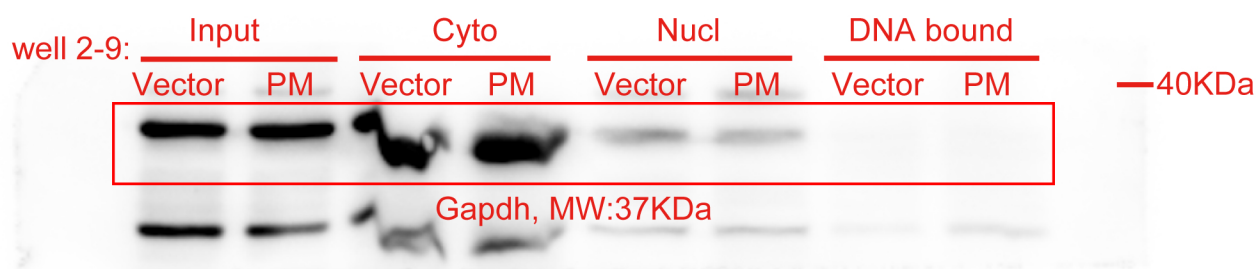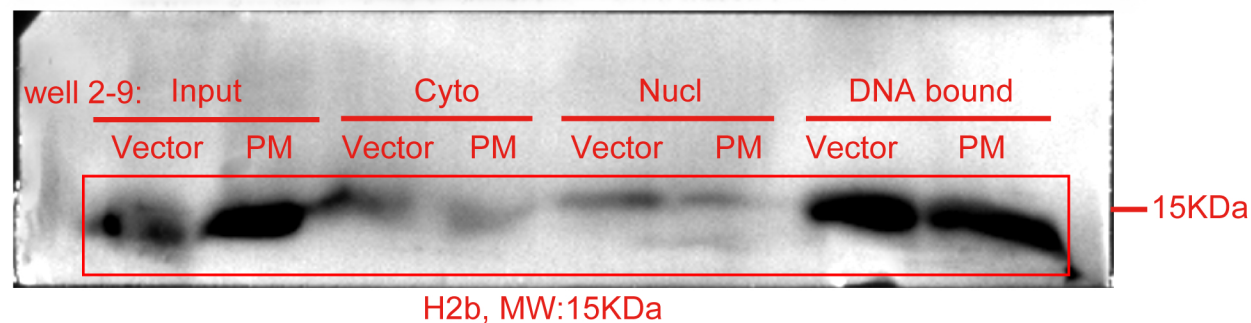

Supplement: pbio.3001297.s018.pdf [file pbio.3001297.s018.pdf]
